# Supplementary material for: Multiple coherent amplitude modes and exciton–phonon coupling in quasi-one-dimensional excitonic insulator Ta2NiSe5
Source: Royal Society of Chemistry journal article supplement (doi:10.1039/d4cp00261j), 2024-01-01
Supplement: d4cp00261j1.pdf [file d4cp00261j1.pdf]

*Supplementary Information for*

**Multiple Coherent Amplitude Modes and Exciton-phonon Coupling in  
Quasi-one-dimensional Excitonic Insulator Ta<sub>2</sub>NiSe<sub>5</sub>**

Yaohua Jiang,<sup>a</sup> Yang Mi,<sup>\*a</sup> Jia Guo,<sup>\*b</sup> Zixuan Wang,<sup>c</sup> Ning Zhang,<sup>c</sup> Bo Liu<sup>b</sup>  
and Sheng-Nian Luo<sup>a</sup>

*<sup>a</sup>Key Laboratory of Advanced Technologies of Materials, Ministry of Education, School  
of Materials Science and Engineering, Southwest Jiaotong University, Chengdu  
610031, People's Republic of China.*

*E-mail: miyang@swjtu.edu.cn*

*<sup>b</sup>Research Center for Optical Fiber Sensing, Research Institute of Intelligent Sensing,  
Zhejiang Lab, Hangzhou, Zhejiang 311100, People's Republic of China*

*E-mail: jguo@zhejianglab.com*

*<sup>c</sup>Research Center for Quantum Sensing, Research Institute of Intelligent Sensing,  
Zhejiang Lab, Hangzhou, Zhejiang 311100, People's Republic of China*

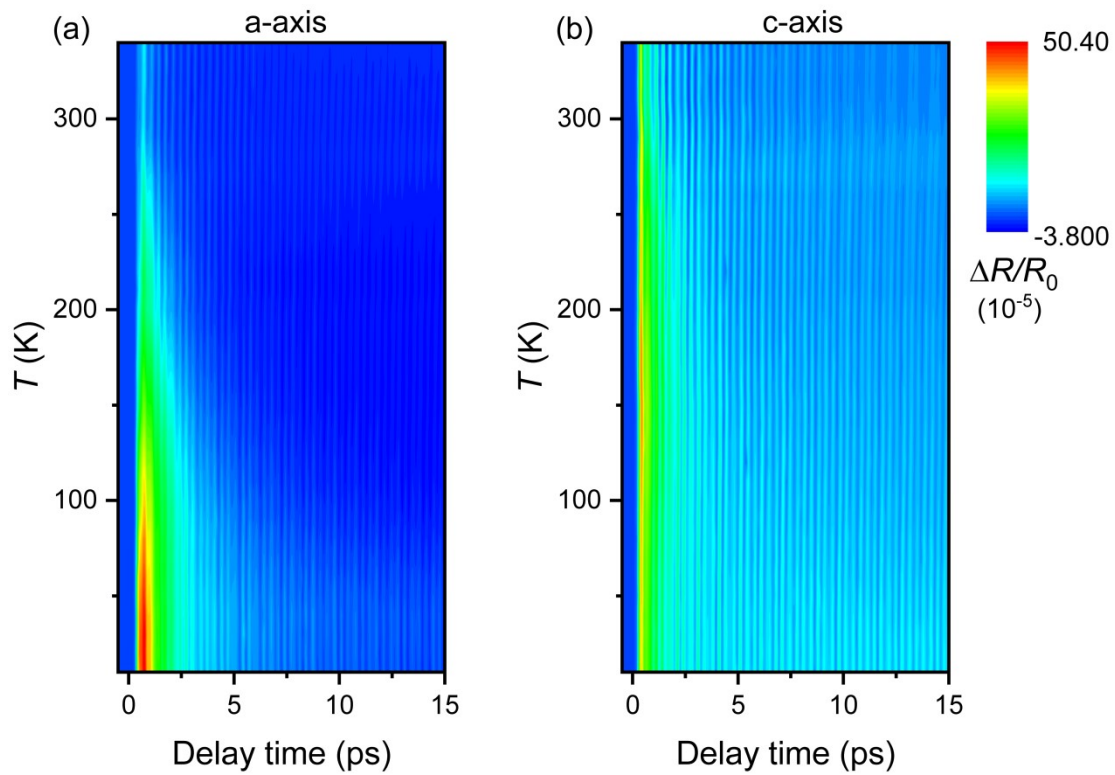

**Fig. S1.** Temperature-dependent  $\Delta R(t)/R_0$  time series collected for a- and c-axis.
